# Supplementary material for: Autophagy drives epidermal deterioration in a Drosophila model of tissue aging
Source: Aging (Albany NY). 2013 Apr 10;5(4):276–87. doi: 10.18632/aging.100549 (PMC3651520; doi:10.18632/aging.100549)
Supplement: Supplementary file 1 [file aging-05-276-s001.pdf]

54. Patel NH, Snow PM and Goodman CS. Characterization and cloning of fasciclin III: a glycoprotein expressed on a subset of neurons and axon pathways in *Drosophila*. *Cell*. 1987; 48:975-988.
55. Fehon RG, Dawson IA and Artavanis-Tsakonas S. A *Drosophila* homologue of membrane-skeleton protein 4.1 is associated with septate junctions and is encoded by the coracle gene. *Development*. 1994; 120:545-557.
56. Demerec M. 1950. *Biology of Drosophila*. (Woodbury, NY: Cold Spring Harbor Laboratory Press).

## SUPPLEMENTARY FIGURES

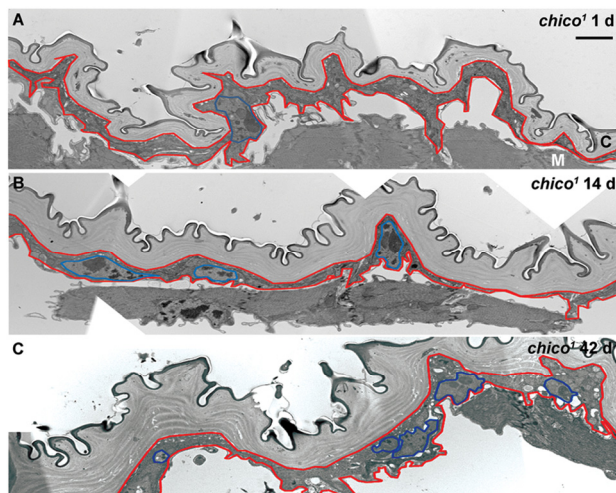

**Figure S1. TEM Analysis Reveals Differential Morphology Changes in the Ventro Lateral Abdominal Epidermis of *chico*<sup>1</sup> Mutants.** TEM of transverse sections of ventro-lateral abdominal epidermis of: **A**, *chico*<sup>1</sup> 1 d. **B**, *chico*<sup>1</sup> 14 d. **C**, *chico*<sup>1</sup> 42 d. Comparison of 14 d old *chico*<sup>1</sup> samples (B) with age-matched controls (Figure 2C) shows that epidermal thickness is preserved. Red, epidermal boundaries. Blue, epidermal nuclei. c, cuticle; m, muscle. Bars, 2  $\mu$ m.

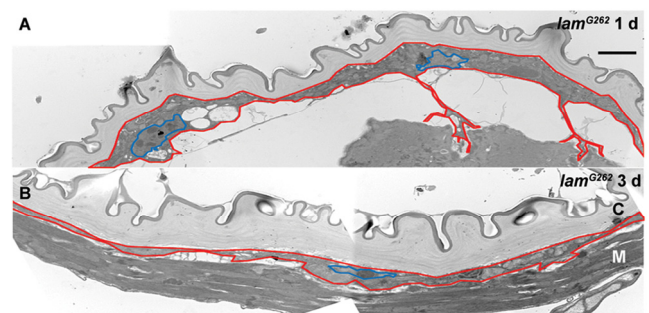

**Figure S2. TEM Analysis Reveals Differential Morphology Changes in the Ventro Lateral Abdominal Epidermis of *lam*<sup>G262</sup> Mutants.** TEM of transverse sections of ventro-lateral abdominal epidermis of: **A**, *lam*<sup>G262</sup> 1 d. **B**, *lam*<sup>G262</sup> 3 d. Note the strongly condensed nuclei in 3 d old *lam*<sup>G262</sup> mutants. Red, epidermal boundaries. Blue, epidermal nuclei. c, cuticle; m, muscle. Bars, 2  $\mu$ m.

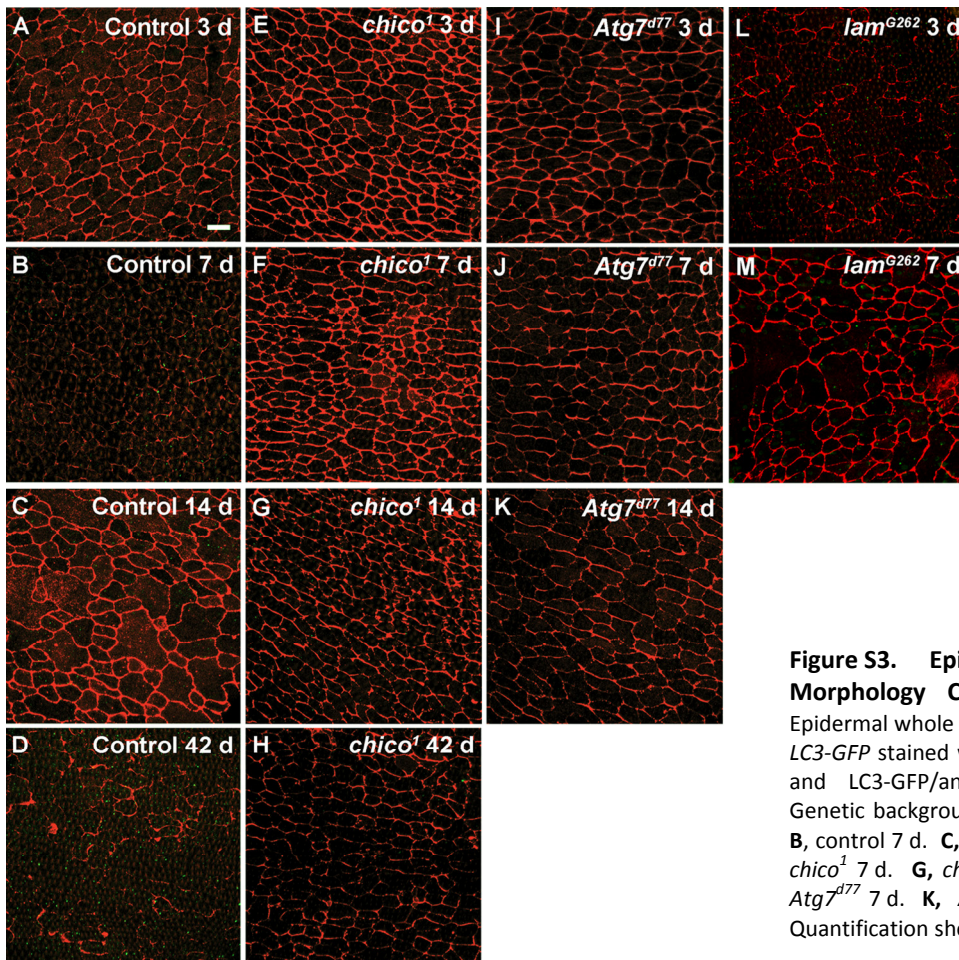

**Figure S3. Epidermal Autophagy Correlates with Morphology Changes in the Aging Epidermis.** A-L, Epidermal whole mounts of flies bearing *NP2108-GAL4* and *UAS-LC3-GFP* stained with anti-Fasciclin III (red) to label membranes and LC3-GFP/anti-GFP (green) to label autophagosomes. Genetic backgrounds as indicated. Bar, 20  $\mu$ m. **A**, control 3 d. **B**, control 7 d. **C**, control 14 d. **D**, control 42 d. **E**, *chico*<sup>1</sup> 3 d. **F**, *chico*<sup>1</sup> 7 d. **G**, *chico*<sup>1</sup> 14 d. **H**, *chico*<sup>1</sup> 42 d. **I**, *Atg7*<sup>d77</sup> 3 d. **J**, *Atg7*<sup>d77</sup> 7 d. **K**, *Atg7*<sup>d77</sup> 14 d. **L**, *lam*<sup>G262</sup> 3 d. **M**, *lam*<sup>G262</sup> 7 d. Quantification shown in Figure 5C.

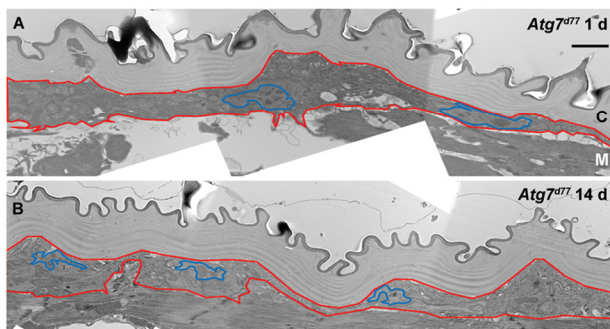

**Figure S4. TEM Analysis Reveals Differential Morphology Changes in the Ventral Abdominal Epidermis of *Atg7*<sup>d77</sup> Mutants.** TEM of transverse sections of ventro-lateral abdominal epidermis of: **A**, *Atg7*<sup>d77</sup> 1 d. **B**, *Atg7*<sup>d77</sup> 14 d. Comparison of 14 d old *Atg7*<sup>d77</sup> samples (**B**) with age-matched controls (Figure 2C) shows that epidermal thickness is preserved. Red, epidermal boundaries. Blue, epidermal nuclei. c, cuticle; m, muscle. Bars, 2  $\mu$ m.

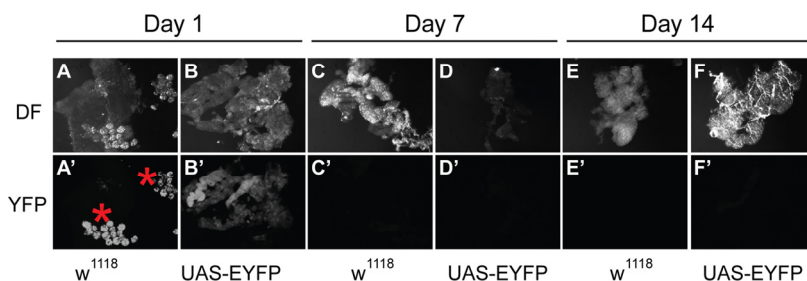

**Figure S5. *NP2108-GAL4* expression does not persist in adult fat body.** Fat body wholemounts from adult abdomens of the *NP2108-GAL4* driver that was crossed to either control *w*<sup>1118</sup> animals (**A**, **A'**, **C**, **C'**, **E**, **E'**) or *UAS-2x eYFP* (**B**, **B'**, **D**, **D'**, **F**, **F'**). Fat body was dissected from animals on days 1 (**A**, **A'**, **B**, **B'**), 7 (**C**, **C'**, **D**, **D'**) or 14 (**E**, **E'**, **F**, **F'**) and imaged with dark field microscopy (DF; **A**-**F**) or fluorescence microscopy to detect eYFP (YFP; **A'**-**F'**). Note autofluorescence of lipids on day 1 (asterisks in **A'**).
